# Supplementary material for: Decision regret of cancer patients after radiotherapy: results from a cross-sectional observational study at a large tertiary cancer center in Germany
Source: Springer Nature journal article supplement (doi:10.1007/s00432-024-05638-0), 2024-03-28

**Supplementary table 1: Comparison of patient characteristics between study participants and non-participants.** ECOG, Eastern Cooperative Oncology Group; IQR, interquartile range.

|                                       |                               | Participants |          | Non-participants |          |                     |
|---------------------------------------|-------------------------------|--------------|----------|------------------|----------|---------------------|
|                                       |                               | Median (IQR) |          | Median (IQR)     |          | <i>p</i>            |
| <b>Age [years]</b>                    |                               | 64 (56-72)   |          | 68 (58.75-75)    |          | 0.092 <sup>a</sup>  |
|                                       |                               | <b>n</b>     | <b>%</b> | <b>n</b>         | <b>%</b> |                     |
| <b>Gender</b>                         | Male                          | 102          | 49       | 46               | 43       |                     |
|                                       | Female                        | 105          | 51       | 62               | 57       | 0.259 <sup>b</sup>  |
| <b>ECOG at follow-up consultation</b> | ECOG 0                        | 156          | 75       | 57               | 53       |                     |
|                                       | ECOG 1                        | 37           | 18       | 27               | 25       |                     |
|                                       | ECOG 2-4                      | 12           | 6        | 20               | 19       |                     |
|                                       | Unknown                       | 1            | 1        | 4                | 4        | <0.001 <sup>b</sup> |
| <b>Primary cancer</b>                 | Breast                        | 84           | 41       | 45               | 42       |                     |
|                                       | Prostate                      | 57           | 28       | 23               | 21       |                     |
|                                       | Head-and-neck                 | 19           | 9        | 10               | 9        |                     |
|                                       | Lung                          | 11           | 5        | 7                | 6        |                     |
|                                       | Rectal                        | 9            | 4        | 3                | 3        |                     |
|                                       | Skin                          | 8            | 4        | 3                | 3        |                     |
|                                       | Multiple myeloma/plasmacytoma | 4            | 2        | 0                | 0        |                     |
|                                       | Sarcoma                       | 3            | 1        | 1                | 1        |                     |
|                                       | Brain                         | 3            | 1        | 4                | 4        |                     |
|                                       | Esophagus                     | 3            | 1        | 2                | 2        |                     |
|                                       | Lymphoma                      | 2            | 1        | 2                | 2        |                     |
|                                       | Urothel                       | 2            | 1        | 4                | 4        |                     |
|                                       | Other                         | 2            | 1        | 4                | 4        | 0.451 <sup>b</sup>  |

<sup>a</sup>unpaired t-test

<sup>b</sup>χ<sup>2</sup>-test

**Extract from the questionnaire in which the German version of the Decision Regret Scale is shown.** Decisions refer to the last course of radiotherapy which was actively communicated to the participants.

|                                                                                | Ich stimme zu                        | Ich stimme überwiegend zu            | Weder noch                           | Ich stimme überwiegend nicht zu      | Ich stimme nicht zu                  |
|--------------------------------------------------------------------------------|--------------------------------------|--------------------------------------|--------------------------------------|--------------------------------------|--------------------------------------|
| Die Entscheidungen waren richtig.                                              | <input type="radio"/> O <sub>1</sub> | <input type="radio"/> O <sub>2</sub> | <input type="radio"/> O <sub>3</sub> | <input type="radio"/> O <sub>4</sub> | <input type="radio"/> O <sub>5</sub> |
| Ich bereue die getroffenen Entscheidungen.                                     | <input type="radio"/> O <sub>1</sub> | <input type="radio"/> O <sub>2</sub> | <input type="radio"/> O <sub>3</sub> | <input type="radio"/> O <sub>4</sub> | <input type="radio"/> O <sub>5</sub> |
| Ich würde die gleiche Wahl treffen, wenn ich mich nochmals entscheiden müsste. | <input type="radio"/> O <sub>1</sub> | <input type="radio"/> O <sub>2</sub> | <input type="radio"/> O <sub>3</sub> | <input type="radio"/> O <sub>4</sub> | <input type="radio"/> O <sub>5</sub> |
| Die Entscheidungen haben mich sehr beeinträchtigt                              | <input type="radio"/> O <sub>1</sub> | <input type="radio"/> O <sub>2</sub> | <input type="radio"/> O <sub>3</sub> | <input type="radio"/> O <sub>4</sub> | <input type="radio"/> O <sub>5</sub> |
| Die Entscheidungen waren klug                                                  | <input type="radio"/> O <sub>1</sub> | <input type="radio"/> O <sub>2</sub> | <input type="radio"/> O <sub>3</sub> | <input type="radio"/> O <sub>4</sub> | <input type="radio"/> O <sub>5</sub> |

**Five questions (in German) regarding the comprehensibility and explicitness of the German version of the Decision Regret Scale, each with a 5-point Likert scale.**

Bitte beurteilen Sie die Verständlichkeit des Fragebogens zum Entscheidungsbedauern:

|                                                                        |                                     |                            |                    |                                  |                                       |
|------------------------------------------------------------------------|-------------------------------------|----------------------------|--------------------|----------------------------------|---------------------------------------|
| 1. Der Fragebogen ist verständlich.                                    | 1<br>Ich stimme voll<br>und ganz zu | 2<br>Ich stimme<br>eher zu | 3<br>Weder<br>noch | 4<br>Ich stimme<br>eher nicht zu | 5<br>Ich stimme<br>überhaupt nicht zu |
| 2. Es fiel mir leicht, die Fragen im Fragebogen zu beantworten.        | 1<br>Ich stimme voll<br>und ganz zu | 2<br>Ich stimme<br>eher zu | 3<br>Weder<br>noch | 4<br>Ich stimme<br>eher nicht zu | 5<br>Ich stimme<br>überhaupt nicht zu |
| 3. Es ist eindeutig, auf welche Entscheidung die Fragen sich beziehen. | 1<br>Ich stimme voll<br>und ganz zu | 2<br>Ich stimme<br>eher zu | 3<br>Weder<br>noch | 4<br>Ich stimme<br>eher nicht zu | 5<br>Ich stimme<br>überhaupt nicht zu |
| 4. Die Fragen sind schwierig zu beantworten                            | 1<br>Ich stimme voll<br>und ganz zu | 2<br>Ich stimme<br>eher zu | 3<br>Weder<br>noch | 4<br>Ich stimme<br>eher nicht zu | 5<br>Ich stimme<br>überhaupt nicht zu |
| 5. Die Fragen belasten mich.                                           | 1<br>Ich stimme voll<br>und ganz zu | 2<br>Ich stimme<br>eher zu | 3<br>Weder<br>noch | 4<br>Ich stimme<br>eher nicht zu | 5<br>Ich stimme<br>überhaupt nicht zu |

## Details of the multiple linear regression analysis

**Predictors of decision regret per multiple linear regression analysis. Complete-case analysis (n=196) with decision regret as dependent variable. The variance inflation factor (VIF) as a measure of multicollinearity is also presented. CI, confidence interval; ECOG, Eastern Cooperative Oncology Group.**

| Variable                                                    | $\beta$ | B      | Lower 95% CI | Upper 95% CI | p                | VIF   |
|-------------------------------------------------------------|---------|--------|--------------|--------------|------------------|-------|
| Gender (reference: female)                                  | 0.115   | 4.382  | -0.414       | 9.177        | 0.073            | 1.114 |
| ECOG                                                        | 0.197   | 6.663  | 1.989        | 11.338       | <b>0.005</b>     | 1.339 |
| Primary cancer (reference: other than head-and-neck cancer) | 0.049   | 3.227  | -6.439       | 12.802       | 0.507            | 1.482 |
| Hospitalization (reference: no hospitalization)             | 0.018   | 0.900  | -6.305       | 8.105        | 0.806            | 1.409 |
| Quality of life                                             | -0.085  | -0.081 | -0.232       | 0.071        | 0.294            | 1.778 |
| Participative decision-making                               | -0.041  | -0.033 | -0.142       | 0.075        | 0.546            | 1.256 |
| Satisfaction with care                                      | -0.236  | -5.939 | -9.223       | -2.655       | <b>&lt;0.001</b> | 1.195 |
| Social support                                              | -0.236  | -1.166 | -1.791       | -0.540       | <b>&lt;0.001</b> | 1.123 |
| Health literacy                                             | -0.083  | -3.453 | -9.462       | 2.557        | 0.258            | 1.470 |
| Distress                                                    | -0.002  | -0.016 | -1.013       | 0.981        | 0.975            | 1.539 |
| Depression                                                  | -0.013  | -0.058 | -1.087       | 0.971        | 0.911            | 3.929 |
| Anxiety                                                     | 0.043   | 0.225  | -0.878       | 1.327        | 0.688            | 3.085 |

## Model summary of the linear regression model.

|                          | Value |
|--------------------------|-------|
| R <sup>2</sup>           | 0.327 |
| Adj. R <sup>2</sup>      | 0.283 |
| Durbin-Watson-Statistics | 1.889 |

## ANOVA of the regression model.

|            | Sum of Squares | df  | Mean Square | F     | p      |
|------------|----------------|-----|-------------|-------|--------|
| Regression | 23138.254      | 12  | 1928.188    | 7.421 | <0.001 |
| Residual   | 47547.162      | 183 | 259.821     |       |        |
| Total      | 70685.417      | 195 |             |       |        |

## Cook's Distance as a measurement of influential outliers within the predictor variables.

|                 | Minimum | Maximum | Mean  | Standard Deviation | N   |
|-----------------|---------|---------|-------|--------------------|-----|
| Cook's Distance | 0.000   | 0.128   | 0.007 | 0.016              | 196 |

### Histogram of regression standardized residuals to evaluate normal distribution of regression standardized residuals

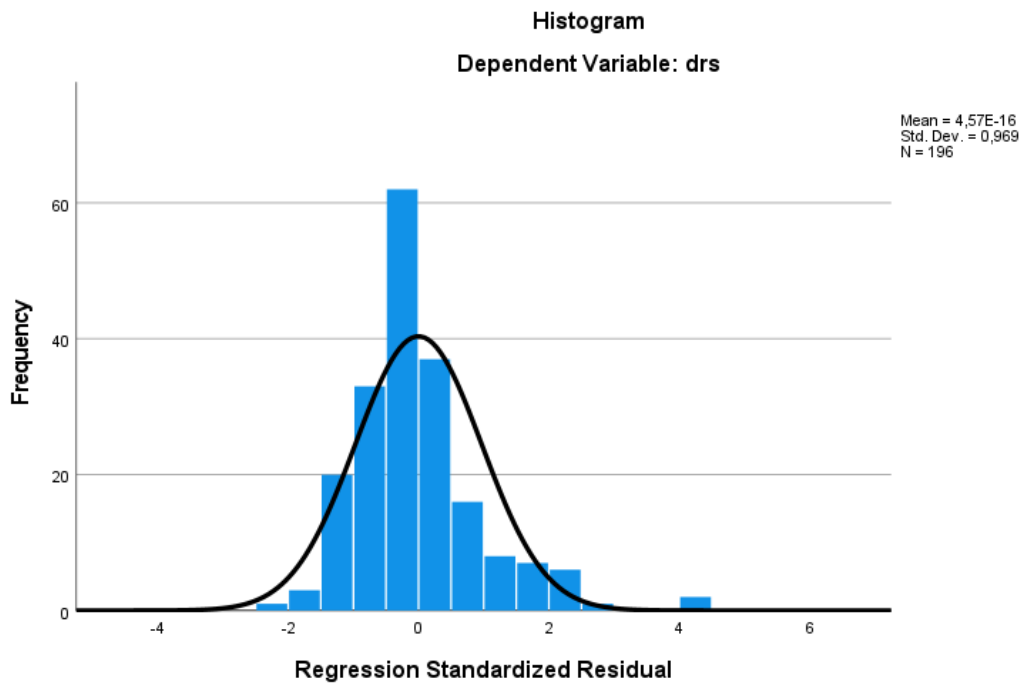

### Predicted Probability plot in order to check normality

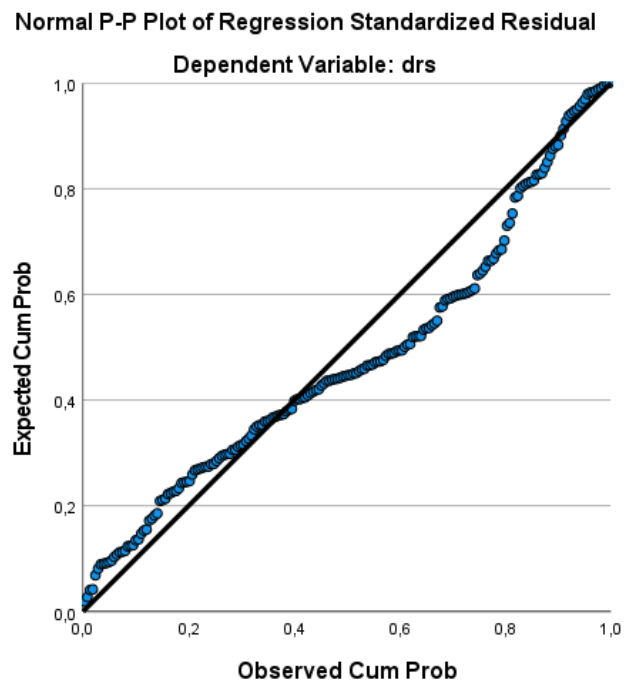

Scatterplot of the regression standardized residuals and standardized predicted values (as a measurement for homoscedasticity).

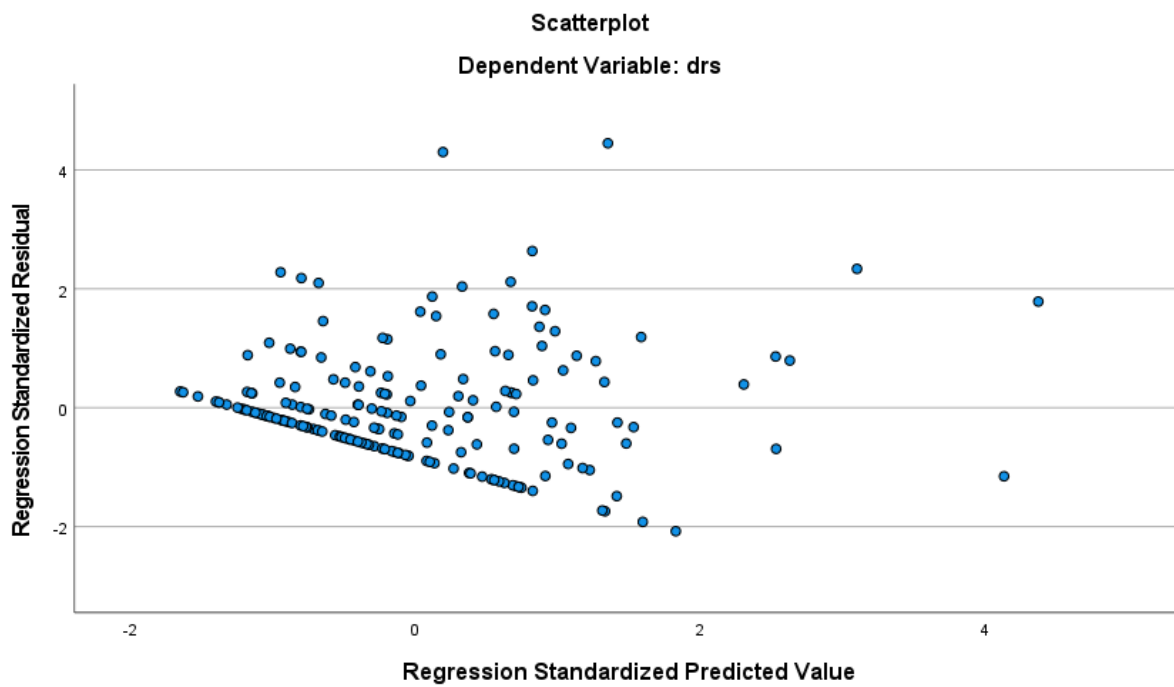

Supplement: MOESM1 [file 26917348]
